# Supplementary material for: Growth and Phenology of Three Dwarf Shrub Species in a Six-Year Soil Warming Experiment at the Alpine Treeline
Source: PubMed Central journal article supplement (PMC4067323; doi:10.1371/journal.pone.0100577), 2014-06-23
Supplement: pone.0100577.s002.pdf [file pone.0100577.s002.pdf]

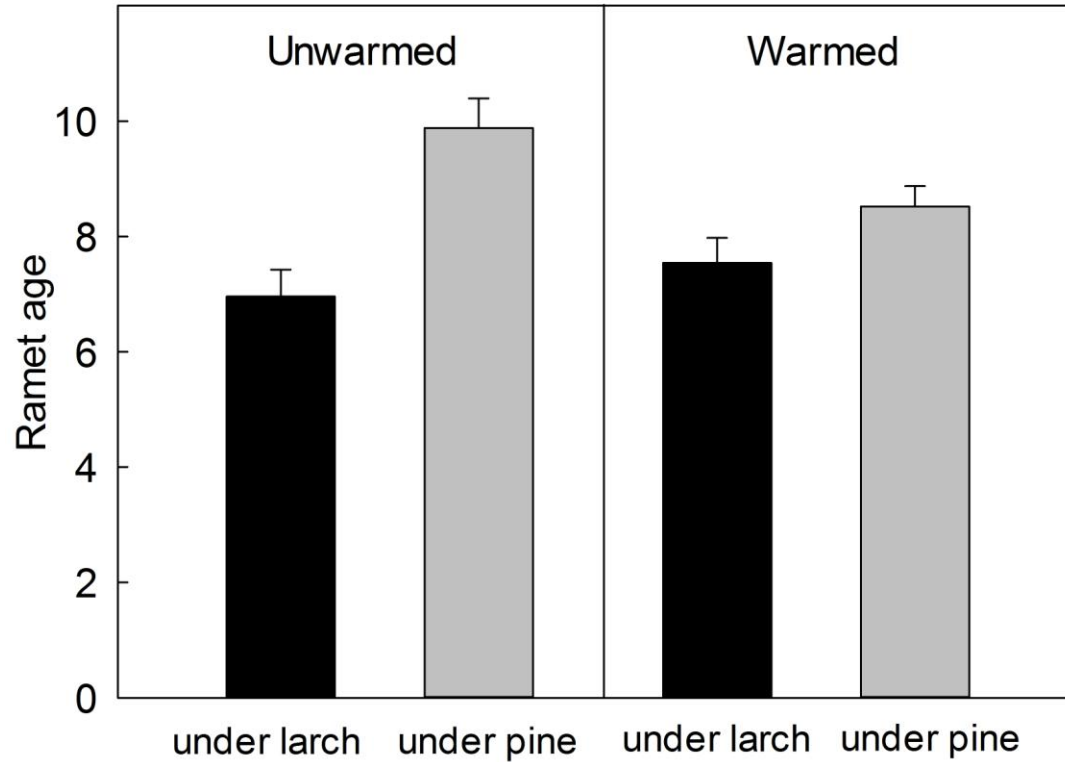

Figure S2. Age (mean +1SE) of *Vaccinium myrtillus* ramets for each soil warming treatment and tree species present in the plot (larch or pine). Significant ( $P < 0.05$ ) age differences were found between ramets in plots with larch and those with pine, and the soil warming x plot tree species interaction was marginally significant ( $P < 0.10$ ).
